# Co-evolution of virulence and immunosuppression through multiple infections

Tsukushi Kamiya <sup>1\*</sup>, Nicole Mideo <sup>1,2</sup>, Samuel Alizon <sup>3,4</sup>

<sup>1</sup> Department of Ecology & Evolutionary Biology, University of Toronto, Toronto, ON M5S 3B2,  
Canada

\* Corresponding author email: [tsukushi.kamiya@mail.utoronto.ca](mailto:tsukushi.kamiya@mail.utoronto.ca)

<sup>2</sup> Email: [nicole.mideo@utoronto.ca](mailto:nicole.mideo@utoronto.ca)

<sup>3</sup> MIVEGEC, CNRS, IRD, Université de Montpellier, France

<sup>4</sup> Email: [samuel.alizon@cnrs.fr](mailto:samuel.alizon@cnrs.fr)

<sup>1</sup> **Running title:** Immunosuppression and virulence evolution

<sup>2</sup> **Keywords:** multiple infections, immunosuppression, virulence, epidemiology, evolution

<sup>3</sup> This article contains 176 words in the abstract, approx. 3920 words in the main text (excluding  
<sup>4</sup> abstract, acknowledgements, references, table and figure legends), 65 references, 3 figures and 1  
<sup>5</sup> table.

6

## Abstract

7

8

9

10

11

12

13

14

15

16

17

18

19

20

Many components of the host-parasite interaction have been shown to affect the way virulence, that is parasite induced harm to the host, evolves. However, co-evolution of multiple traits is often neglected. We explore how an immunosuppressive mechanism of parasites affects and co-evolves with virulence through multiple infections. Applying the adaptive dynamics framework to epidemiological models with co-infection, we show that immunosuppression elevates the evolutionarily stable (ES) virulence through epidemiological feedbacks. We explore the co-evolution of the two parasite traits across different extrinsic mortality conditions, and find that the peak ES virulence occurs at an intermediate level of background host mortality when immunosuppression is considered. The highest co-ES virulence is achieved at the intermediate level of background mortality which we interpret by considering the abundances of each host types. In addition, we find that immunosuppression evolution is influenced considerably by the precise shape of the trade-offs determining the cost and benefit of immunosuppression. These results demonstrate that the ES virulence is shaped by immunosuppression, while highlighting that the evolution of immune evasion mechanisms deserves further research attention.

## 21 **Introduction**

22 The fundamental question of virulence evolution, that is, ‘Why do some parasite strains harm their  
23 hosts more than others?’ has been a central focus of evolutionary epidemiology for both its conceptual  
24 and applied significance (Ewald, 1994, Read, 1994, Schmid-Hempel, 2011, Méthot, 2012, Alizon and  
25 Michalakis, 2015). The adaptive explanation of virulence is typically centred around the understand-  
26 ing of trade-offs involving virulence and other parasite fitness components such as transmission and  
27 competitiveness in multiple infections (Anderson and May, 1982, Ewald, 1983, Alizon et al., 2009,  
28 2013). While these trade-off theories explain the evolution of finite non-zero optimal virulence, ex-  
29 actly how much virulence a parasite should evolve depends on a variety of processes (Cressler et al.,  
30 2016). For example, host traits (e.g. host immune responses) and their interactions with co-evolving  
31 parasite adaptations (e.g. parasite immune evasion strategies; Frank and Schmid-Hempel, 2008, Ali-  
32 zon, 2008b, Cressler et al., 2016) are likely to influence the trade-offs. The present theoretical study  
33 explores how a parasite immunosuppression strategy, namely the ability of parasites to hinder host  
34 recovery, co-evolves with virulence.

35 The ability of parasites to suppress host immunity is ubiquitous in nature (Schmid-Hempel, 2009)  
36 and frequently help explain chronic infections (Virgin et al., 2009). In humans for instance, infections  
37 by human papillomaviruses (HPVs) and human immunodeficiency virus (HIV) offer two contrasting  
38 immune suppression strategies: while the former interferes with the cellular machinery to reduce the  
39 presentation of viral antigens or impede the interferon response (Doorbar et al., 2012), the latter in-  
40 fects and lyses T lymphocytes (Levy, 1998). Regardless of the specific mechanism involved, however,  
41 the adaptive benefit for the parasite is realised through prolonged infection duration (Schmid-Hempel,  
42 2009). For the scope of our study, we generalise any parasite adaptation against host immunity that  
43 results in lowered host recovery rate as immunosuppression.

44 In the absence of constraints, it is in the parasite’s best interest to evolve maximal immunosup-

45 pression, when immunity serves only to kill parasites. However, lowered host immunity is likely to  
46 impose at least one cost to the parasite: an immunocompromised host may be more vulnerable to fur-  
47 ther infection by conspecific and heterospecific parasites. A meta-analysis by Graham (2008) shows  
48 that lowered immune responses, due to the presence of an immunosuppressive helminth, increase  
49 microparasite population density within hosts. Furthermore, experimental evidence suggests that im-  
50 munosuppression could lead to increased host mortality through additional infections by opportunistic  
51 parasites (Cornet and Sorci, 2010). Therefore, multiple infections — which are so prevalent that they  
52 could be argued to be the rule rather than the exception (Petney and Andrews, 1998, Cox, 2001, Read  
53 and Taylor, 2001, Juliano et al., 2010, Balmer and Tanner, 2011) — are likely a main driver of the  
54 co-evolution between virulence and immunosuppression.

55 If immunosuppression leads to more multiple infections, one might predict that this should lead  
56 to increased virulence. Many theoretical, and some empirical, studies support the notion that within-  
57 host competition leads to the evolution of higher virulence (reviewed in Mideo, 2009). Similarly,  
58 at the epidemiological level, as the density of co-infected hosts increases, so does the optimal level  
59 of virulence (van Baalen and Sabelis, 1995, Choisy and de Roode, 2010). However, given that the  
60 benefit of immunosuppression is assumed to be a longer duration of infection, increasing virulence  
61 would counteract this effect. Therefore, without a formal model, intuition fails to predict the direction  
62 in which virulence evolves when immunosuppression is considered.

63 To elucidate the evolutionary outcome of the co-evolution of virulence and immunosuppression,  
64 we develop mathematical epidemiology models, in which we assume that the two infection traits are  
65 carried by the same parasite species (as in in van Baalen and Sabelis, 1995). Furthermore, we also  
66 investigate how the co-evolved optimal strategy is affected by the rate of host background mortality,  
67 a key epidemiological parameter that has been shown to alter evolutionary predictions (Sasaki and  
68 Iwasa, 1991, Day and Proulx, 2004, Cressler et al., 2016).

## 69 **The model**

70 We use an evolutionary epidemiology approach based on adaptive dynamics theory (Geritz et al.,  
71 1998, Dieckmann et al., 2002, Otto and Day, 2007). We first present the epidemiological model  
72 itself, then the evolutionary trade-offs that constrain evolution and finally we show how the (co-  
73 )evolutionary analyses are conducted.

## 74 **Epidemiological dynamics**

75 We employ a co-infection framework, which allows for coexistence of two parasite strains within a  
76 host (van Baalen and Sabelis, 1995). In this model, hosts are divided into three classes: susceptible,  
77 singly infected and doubly infected, occurring at densities  $S$ ,  $I$  and  $D$  respectively. Following the  
78 notation of Table 1, we derive the following system of ordinary differential equations (ODEs) to  
79 describe the changes of the resident system over continuous time:

$$\frac{dS}{dt} = \rho - \mu S - \lambda_r S + \gamma I_r \quad (1a)$$

$$\frac{dI_r}{dt} = \lambda_r S - (\mu + \alpha) I_r - \sigma \lambda_r I_r - \gamma I_r + 2 \gamma D_{rr} \quad (1b)$$

$$\frac{dD_{rr}}{dt} = \sigma \lambda_r I_r - (\mu + \alpha) D_{rr} - 2 \gamma D_{rr} \quad (1c)$$

80 where the subscript  $r$  denotes the resident parasite strain. In this formulation, there is a constant  
81 input of susceptible hosts into the population at the rate  $\rho$ . Susceptible hosts exit the system through  
82 background mortality at the rate  $\mu$  while infected hosts, both singly and doubly infected individuals,  
83 experience additional mortality caused by parasites (i.e., virulence  $\alpha$ ). Susceptible and singly infected  
84 hosts acquire infection according to the force of infection  $\lambda_r = \beta I_r + \beta D_{rr}$ , where  $\beta$  corresponds to  
85 the parasite transmission rate. The host class for double infection by the same strain,  $D_{rr}$  is included  
86 in the system for a technical motivation: it is necessary for an unbiased invasion analysis because the  
87 mutant strain would gain a frequency-dependent advantage in its absence (discussed in Alizon, 2008a,

88 Lipsitch et al., 2009). Within the existing epidemiological framework, the effect of host immunity can  
89 be implicitly accounted for as the rate of recovery (equivalent to the rate of parasite clearance). We  
90 assume that hosts recover from infection at a rate  $\gamma$ , in a stepwise fashion, i.e., doubly infected hosts  
91 ( $D$ ) only lose one infection at a time). The key feature of our model is that we assume that singly  
92 infected hosts ( $I$ ) suffer an increased risk of contracting a further infection at a rate proportional to a  
93 coefficient  $\sigma$ . We treat the host class  $D_{rr}$  similarly to singly infected hosts  $I_r$ , except for the fact that  
94 the doubly infected hosts cannot be infected any further. The resident equilibrium can be computed  
95 analytically.

## 96 **Within-host processes and resulting trade-offs**

97 When co-infection competitive advantage is linked to the extent of resource exploitation — which  
98 itself correlates with virulence — adaptive evolution of virulence is expected independently of the  
99 classic trade-off between virulence and transmission (van Baalen and Sabelis, 1995, Choisy and  
100 de Roode, 2010). Here, we assume that virulence ( $\alpha$ ) increases linearly with the level of resource  
101 exploitation by a parasite ( $x$ ), such that  $\alpha(x) = a x$ , where  $a$  is a proportionality constant (we explore  
102 a transmission-virulence trade-off in the Supplementary Information 3). We then assume that finding  
103 themselves in a doubly infected host is inherently costly for parasites due to exploitation competition  
104 between co-infecting strains (Mideo, 2009, Schmid-Hempel, 2011), and that more virulence strains  
105 are more competitive in multiple infections (de Roode et al., 2005, Bell et al., 2006, Ben-Ami et al.,  
106 2008, Zwart et al., 2009):

$$\beta_{rm}(x_r, x_m) = \left( \frac{x_r}{x_r + x_m} \right) \beta \quad (2a)$$

$$\beta_{mr}(x_r, x_m) = \left( \frac{x_m}{x_r + x_m} \right) \beta. \quad (2b)$$

107 There is ample empirical evidence that immunosuppression benefits the parasites by prolonging

108 infections (reviewed in Schmid-Hempel, 2008), and lowered host immunity would increase the sus-  
109 ceptibility to multiple infections (Palefsky and Holly, 2003, Rockstroh and Spengler, 2004, Cornet  
110 and Sorci, 2010). Thus, the key trade-off in our model is between infection duration and susceptibil-  
111 ity to co-infections (both being mediated by immunosuppression). We, therefore, assume a trade-off  
112 between the rate of recovery,  $\gamma$ , and additional susceptibility of infected hosts to co-infection,  $\sigma$ , by  
113 making them both functions of immunosuppression intensity,  $\theta$ . It is conceivable for the decline of  
114 recovery rate and the increase of additional susceptibility to either accelerate or decelerate with in-  
115 creasing immunosuppression. Because the trade-off shape typically matters for evolutionary dynamics  
116 (Bowers et al., 2005, Kisdi, 2006) and little is known from empirical data, we explore the trade-offs  
117 involving recovery and susceptibility as both accelerating and decelerating functions of immunosup-  
118 pression. The parameters  $\delta_\gamma$  and  $\delta_\sigma$  control the degree of concavity of the effect of immunosuppression  
119 on recovery and increased susceptibility, respectively (eq. 3; Fig. S1).

$$\gamma(\theta) = \gamma_{\max} \begin{cases} \left(1 - \frac{\theta}{\theta_{\max}}\right)^{\delta_\gamma}, & \text{if accelerating} \\ 1 - \left(\frac{\theta}{\theta_{\max}}\right)^{\delta_\gamma}, & \text{if decelerating} \end{cases} \quad (3a)$$

$$\sigma(\theta) = 1 + \sigma_{\text{range}} \begin{cases} 1 - \left(1 - \frac{\theta}{\theta_{\max}}\right)^{\delta_\sigma}, & \text{if accelerating} \\ \left(\frac{\theta}{\theta_{\max}}\right)^{\delta_\sigma}, & \text{if decelerating} \end{cases} \quad (3b)$$

120 With these functions, we assume that the realised recovery rate,  $\gamma(\theta)$ , decreases as a function  
121 of immunosuppression such that it equals the intensity of host immunity,  $\gamma_{\max}$ , in the absence of  
122 immunosuppression and approaches 0 as immunosuppression approaches  $\theta_{\max}$ . We also assume that  
123 the proportional gain in susceptibility to a further infection,  $\sigma(\theta)$ , elevates the force of infection  
124 experienced by an immunosuppressed singly infected host by up to  $1 + \sigma_{\text{range}}$  fold at the upper limit  
125 of immunosuppression (when  $\theta = \theta_{\max}$ ).

**Table 1: Parameter notation, description and default values.** Parameter values chosen to sustain non-zero and non-complex equilibria for the resident system and relevant evolutionarily singular strategies. Parameters that are functions of others, are indicated with the dependent parameters (or variables) inside parentheses. When we allow only immunosuppression to evolve virulence,  $\alpha$ , is a constant; otherwise,  $\alpha$  evolves as a function of  $a$  and  $x$ .

| Symbol                             | Description                                                | Value (or range)           |
|------------------------------------|------------------------------------------------------------|----------------------------|
| $\rho$                             | Susceptible host birth rate                                | 100                        |
| $\mu$                              | Background mortality rate                                  | [0.001, 0.1]               |
| $\beta$                            | Transmission rate                                          | 0.001                      |
| $\lambda$                          | Force of infection                                         | $\lambda(\beta, I, D)$     |
| $\alpha$                           | Virulence: parasite-induced mortality                      | [0, 0.5] or $\alpha(a, x)$ |
| $\gamma$                           | Realised recovery rate                                     | $\gamma(\theta)$           |
| $\sigma$                           | Increased susceptibility of infected hosts                 | $\sigma(\theta)$           |
| $\theta$                           | Immunosuppression                                          | [0, 100]                   |
| $\theta_{\max}$                    | Maximum immunosuppression                                  | 100                        |
| $\gamma_{\max}$                    | Maximum host recovery rate                                 | 0.5                        |
| $1 + \sigma_{\text{range}}$        | Maximum susceptibility coefficient                         | [1, 5]                     |
| $\{\delta_\gamma, \delta_\sigma\}$ | Recovery-co-infection susceptibility trade-off curve shape | {0.1, 0.5}                 |
| $a$                                | Virulence scaling parameter                                | 0.1                        |
| $x$                                | Resource exploitation rate                                 | [0.001, 5]                 |



## 126 Evolutionary analyses

### 127 The mutant systems

128 We carry out an invasion analysis investigating perturbation of the resident state by adding a rare  
 129 mutant strain, the densities and traits of which are denoted with subscript  $m$ . For the evolution of  
 130 immunosuppression, the dynamics of the mutant strain are summarised in the following system of  
 131 ODEs:

$$\frac{dI_m}{dt} = \lambda_m S - (\mu + \alpha) I_m - \sigma(\theta_m) \lambda_r I_m - \gamma(\theta_m) I_m + \gamma(\theta_{rm}) D_{rm} \quad (4a)$$

$$\frac{dD_{rm}}{dt} = \sigma(\theta_r) \lambda_m I_r + \sigma(\theta_m) \lambda_r I_m - (\mu + \alpha) D_{rm} - 2 \gamma(\theta_{rm}) D_{rm} \quad (4b)$$

132 where  $\lambda_r = \beta I_r + \beta D_{rr} + \beta_{rm} D_{rm}$  and  $\lambda_m = \beta I_m + \beta_{mr} D_{rm}$ . For simplicity we assume that the  
 133 order of infection does not matter so that  $D_{rm}$  is identical to  $D_{mr}$ . We neglect hosts infected twice by  
 134 the mutant strain (which would be  $D_{mm}$ ) because it is unlikely that the same host gets infected twice  
 135 by a rare mutant. Recovery from  $D_{rm}$  can be achieved through either clearing a resident or a mutant  
 136 parasite. Other aspects of demographic changes of the mutant system are identical to the resident  
 137 system described above.

138 We assume that the level of immunosuppression in co-infection is the average between the resident  
 139 and mutant strain, i.e.  $\theta_{rm} = \frac{\theta_r + \theta_m}{2}$ . For virulence evolution, we assume that the only within-host  
 140 interaction between co-infecting parasites is competition for the shared host resources. Therefore, we  
 141 also calculate the overall virulence of co-infection as the average of the two strains, i.e.  $\alpha_{rm} = \frac{\alpha_r + \alpha_m}{2}$ .

142 The mutant dynamics for virulence evolution are governed by

$$\frac{dI_m}{dt} = \lambda_m S - (\mu + \alpha(x_m)) I_m - \lambda_r \sigma(\theta) I_m - \gamma(\theta) I_m + \gamma(\theta) D_{rm} \quad (5)$$

$$\frac{dD_{rm}}{dt} = \lambda_m \sigma(\theta) I_r + \lambda_r \sigma(\theta) I_m - (\mu + \alpha_{rm}) D_{rm} - 2 \gamma(\theta) D_{rm} \quad (6)$$

143 where  $\lambda_r$  and  $\lambda_m$  are the force of infection for the resident and mutant, respectively, defined here  
144 as  $\beta I_r + \beta D_{rr} + \beta_{rm} D_{rm}$  and  $\beta I_m + \beta_{mr} D_{rm}$ . We again assume the trade-offs between recovery and  
145 co-infection susceptibility as functions of immunosuppression in this model.

## 146 **Adaptive dynamics**

147 The fate of a rare mutant strain is determined by its fitness function (here denoted  $R$ ), that is, the  
148 ability to spread through a host population already infected with a resident parasite (Geritz et al.,  
149 1998, Dieckmann et al., 2002). In the continuous time scale, the mutant parasite invades and replaces  
150 the resident if  $R$ , calculated as the dominant eigenvalue of the Jacobian matrix of the mutant system, is  
151 positive (Otto and Day, 2007). Consequently, an evolutionarily singular strategy can be found where  
152 the change of  $R$  ceases with respect to the evolving trait. For example, an evolutionarily singular  
153 strategy of immunosuppression (denoted  $\theta^*$ ) can be found when  $\theta^*$  is an extremum of  $R$ :

$$\frac{\partial R}{\partial \theta_m} \Big|_{\theta_m = \theta_r = \theta^*} = 0. \quad (7)$$

154 The properties of a singular strategy can then be assessed by the second derivatives of  $R$ . Follow-  
155 ing the notations used by Geritz et al. (1998), here we denote the second derivatives of  $R$  with respect  
156 to the resident and mutant strain with  $a$  and  $b$ :

$$a = \frac{\partial^2 R}{\partial \theta_r^2} \Big|_{\theta_m = \theta_r = \theta^*}, \quad b = \frac{\partial^2 R}{\partial \theta_m^2} \Big|_{\theta_m = \theta_r = \theta^*} \quad (8)$$

157 The convergence stable ES (i.e. evolutionarily stable and convergent stable; the continuously  
158 stable strategy, CSS *sensu* Eshel (1983)) condition is satisfied when  $b < 0$  and  $a - b > 0$ . The first  
159 condition states that  $R$  is at a local maximum and hence convergent stable and the second condition  
160 implies no mutant invasion is possible at the point, meaning evolutionarily stable (Geritz et al., 1998).  
161 Various other possible configurations of evolutionarily and convergence stability are discussed in

162 Geritz et al. (1998).

## 163 **Co-evolution of virulence and immunosuppression**

164 We graphically identified the convergence stable, co-evolutionarily stable strategy (co-ESS) as the  
165 intersection between the ESSs of immunosuppression and virulence (Choisy and de Roode, 2010,  
166 Alizon, 2013). This intersection can be interpreted game theoretically as the strategy for which no  
167 invasion of a mutant strain with respect to either immunosuppression or virulence is possible (May-  
168 nard Smith, 1982, Dieckmann et al., 2002). We then explore the co-evolution of the two traits across  
169 different extrinsic mortality conditions and immunosuppression trade-off concavity.

## 170 **Results**

### 171 **Virulence evolution**

172 We first assume that the level of immunosuppression is constant and infer the virulence level towards  
173 which the parasite population evolves, that is the evolutionarily stable virulence (ESV). We find that  
174 the higher the immunosuppression, the higher the ESV (grey curve in Figure 1a). Because immuno-  
175 suppression renders infected hosts more susceptible to further infections, it consequently increases the  
176 relative abundance of doubly infected hosts. This favours more virulent parasites due to within-host  
177 competition assumption (see equation 2).

### 178 **Immunosuppression evolution**

179 We then set the virulence to a constant value and study whether parasite immunosuppression evolves  
180 towards an evolutionarily stable strategy (i.e. evolutionarily stable immunosuppression, or ESI; black  
181 curve in Figure 1a). We find that ESI decreases with virulence at first, but it increases again when vir-  
182 ulence is high enough. The initial decrease can be attributed to two non-mutually exclusive processes.

183 First, the benefits gained by increasing immunosuppression (i.e., slower host recovery) are reduced  
184 as virulence increases since the duration of infection decreases. In a similar way, ESI decreases as  
185 host mortality increases (Figure 2a). Second, the decreasing pattern may originate from demographic  
186 feedbacks: increasing virulence reduces the number of doubly infected hosts. In doubly infected  
187 hosts, parasites no longer pay the cost of contracting further infections but can still gain benefits from  
188 higher levels of immunosuppression. For low levels of virulence, most infections are double infec-  
189 tions (Figure 1d) and ESI is high. As virulence increases, the proportion of doubly infected hosts goes  
190 down, and so does ESI as a consequence.

191 We also find that the ESI increases with virulence when virulence is high enough. As the host  
192 lifespan of an infected host decreases due to high parasite-induced mortality, it becomes unlikely for  
193 a host to survive a single infection long enough to get infected again. At this point, co-infections  
194 are sufficiently rare (Figure 1d) that a parasite with a high level of immunosuppression would rarely  
195 suffer the cost associated with that trait. Taken together, focusing on the prevalence of co-infections  
196 alone is not enough to predict how ESI will evolve.

197 The co-ESS is found at the intersection between the two curves in Figure 1. For our default pa-  
198 rameters, this occurs at intermediate values of immunosuppression and virulence. We now investigate  
199 how changes in host mortality and trade-off shape affect this co-ESS.

## 200 **Co-evolution of virulence and immunosuppression**

201 We first explore how the co-ESS varies with respect to the rate of host background mortality. We find  
202 that co-ES immunosuppression (co-ESI) always decreases with host background mortality (black line  
203 in Figure 2a). This result is in agreement with the intuition that immunosuppression represents a lost  
204 investment if the host dies too rapidly.

205 For co-ES virulence (co-ESV), we find that it peaks at an intermediate value of background mor-  
206 tality (gray line in Figure 2a). Based on earlier models (van Baalen and Sabelis, 1995, Gandon et al.,

207 2001), we expected increasing background mortality to select for reduced parasite virulence through a  
208 reduction in multiple infections (purple line in Figure 2b), where more virulent strains were assumed  
209 to have a competitive advantage.

210 However, the availability of singly infected hosts, or rather lack thereof, adds another layer of  
211 complexity to the problem. As shown in Figure 2b, when the force of infection and immunosuppres-  
212 sion are too high, most resident hosts are co-infected and hence most resident parasites are ‘locked  
213 up’ in co-infections, creating a shortage of hosts singly infected with the resident parasite,  $I_r$ . In this  
214 case, when a rare mutant is introduced to the system, it only has access to uninfected ( $S$ ) hosts. This  
215 ‘protection effect’ may hinder the evolution of a parasite trait such as virulence that is assumed ad-  
216 vantageous only in doubly infected hosts ( $D_{rm}$ ). Increasing host mortality diminishes this protection  
217 effect by increasing the relative density of  $I_r$ , thereby favouring more virulent strains (see Figure 2b  
218 and the Supporting Information 2 for details on how the input into  $I_r$  and the duration of infection is  
219 greater where there is immunosuppression).

220 Little is known about how immunosuppression impacts host recovery and susceptibility to further  
221 infection. Therefore, we also explored the sensitivity of our co-ESS results to the qualitative shape  
222 of the immunosuppression trade-off and the extent of its concavity using parameters,  $\delta_\sigma$  and  $\delta_\gamma$ . For  
223 immunosuppression, we find that the singular strategy is evolutionarily unstable when the recovery  
224 concavity is accelerating (Fig. 3a) meaning that in this case immunosuppression is either maximised  
225 or minimised depending on the initial conditions. Furthermore, we find that immunosuppression is  
226 maximised for a large area of the linear and decelerating recovery trade-off space,  $\delta_\gamma$ . Intermediate  
227 ESI levels are observed for decelerating recovery,  $\delta_\gamma$ , and accelerating susceptibility,  $\delta_\sigma$ . Overall,  
228 this suggests that there is a tendency for parasites to specialise in immunosuppressing their host or to  
229 completely avoid doing so.

230 For virulence, we find that the evolutionary dynamics are qualitatively less variable and that the  
231 singular strategies are always convergence and evolutionarily stable (Figure 3b). Regarding the ES

232 virulence value itself, the concavity of the susceptibility function ( $\delta_\sigma$ ) has the strongest effect, with  
233 decelerating trade-offs leading to higher co-ESV. As in the rest of this model, since the only benefit  
234 associated with virulence is increased competitiveness in co-infected host, the co-ESV is a marker  
235 of the relative prevalence of each type of host (susceptible, infected and co-infected), which itself is  
236 shaped by immunosuppression.

## 237 **Discussion**

238 Host immune responses present a major challenge for parasites, and hence establishing a successful  
239 infection often depends upon a parasite's ability to evade host immunity (Schmid-Hempel and Frank,  
240 2007). Despite its ubiquity among all major groups of parasitic organisms (Schmid-Hempel, 2009),  
241 the effect of immunosuppression on virulence evolution has largely been overlooked (but see Hurford  
242 and Day, 2013). We modelled immunosuppression through its joint effect on host recovery and sus-  
243 ceptibility to co-infection in an attempt to understand epidemiological forces driving the co-evolution  
244 of virulence and immunosuppression.

245 We found that immunosuppression increases the optimal parasite exploitation by creating more  
246 co-infections, in which more competitive (and hence more virulent) strains are favoured. On the other  
247 hand, the evolution of immunosuppression is driven by the balance between the benefit conferred by  
248 immunosuppression to evade clearance from the host and the associated cost of contracting further  
249 infections, which introduce a competitor for limited host resources. Because virulence simultaneously  
250 decreases both the benefit (by killing hosts faster) and the cost (by reducing the risk of co-infection),  
251 its effect on the optimal immunosuppression is nuanced — increasing virulence can both increase  
252 or decrease the optimal immunosuppression depending on the baseline virulence of the parasite. In  
253 addition, immunosuppression evolution is influenced considerably by the precise shape of the trade-  
254 offs determining the cost and benefit of immunosuppression.

255 We then investigated the change in co-evolutionarily optimal strategies of the both traits over  
256 host background mortality. We find that mortality decreases the co-evolutionarily stable level of  
257 immunosuppression, which is a lost investment when hosts die too fast anyway. In the absence of  
258 immunosuppression, we expect the optimal virulence to consistently decrease with host background  
259 mortality because, again, investing in the competitive ability (with which virulence correlates) is a  
260 wasted investment when co-infections are rare (van Baalen and Sabelis, 1995, Gandon et al., 2001).  
261 When co-evolving with immunosuppression, however, we find that evolutionarily stable virulence  
262 peaks for an intermediate level of host mortality. This stems from the fact that for low host mortality,  
263 co-infections are very prevalent and because we put a limit to the maximum number of strains a host  
264 can be co-infected by, rare mutants can only infect uninfected hosts. Biologically, such a scenario  
265 may arise from a priority advantage for space and resources for the resident, or apparent competition  
266 mediated through the immune system (Mideo, 2009, Hoverman et al., 2013).

267 In light of our theoretical model, we can formulate testable predictions. In *Daphnia*, for example,  
268 the rate of host background mortality can be experimentally manipulated and its effect on virulence  
269 evolution of microsporidian parasites can be quantified (Ebert and Mangin, 1997). Microsporidians  
270 are common eukaryotic parasites of many animals including *Daphnia*, which often harbour multiple  
271 infections (Ebert, 2005). In their mosquito host, microsporidians have been suggested to suppress host  
272 immunity by manipulating the production pathway of a host immune defence molecule (nitric-oxide,  
273 NO), which is part of the innate immune system conserved in all animals (Biron et al., 2005). Conve-  
274 niently, the production of NO can also be experimentally enhanced and blocked, making it possible to  
275 investigate the effects of manipulating host immune intensity (Rivero, 2006). Therefore investigation  
276 of the NO pathway in the *Daphnia* system may be useful for understanding how immunosuppression  
277 interacts with the effect of host background mortality and host immunity on virulence evolution.

278 A natural extension to the model of co-infection by the same species (van Baalen and Sabelis,  
279 1995) is the model that accommodates two distinct resident parasite species, each of which can be

280 challenged by a mutant (Choisy and de Roode, 2010). Under the different species model, two co-  
281 evolving traits (e.g. immunosuppression and virulence) could be carried by two separate parasite  
282 species, which better reflect the reality for some immunosuppressing parasites, e.g, the immunosup-  
283 pressing capabilities of HIV render the host susceptible to the virulence induced by opportunistic  
284 infections. Similarly, in an amphipod system, Cornet and Sorci (2010) show that immunosuppressive  
285 parasites elevate host mortality by promoting opportunistic pathogen infections. Furthermore, there  
286 is evidence that pathological severity of malaria infection can be amplified through immunosuppres-  
287 sion caused by helminths, which are common parasites in malaria prevalent tropical regions (Graham  
288 et al., 2005). Given the positive link between host mortality and virulence evolution predicted by  
289 the virulence-transmission trade-off (which we did not consider in the present study), immunosup-  
290 pression may also elevate the evolutionarily stable virulence by increasing mortality of co-infected  
291 individuals. That being said, considering multiple species would force us to revisit our assumption  
292 that more virulent mutants are more competitive than their resident at the within-host level. Indeed,  
293 this assumption has recently been shown to hold for a variety of within-host processes but only if the  
294 mutant traits are close to that of the resident (Sofonea et al. in prep). Therefore, adding more details  
295 about the within-host interactions, e.g. via a nested model (Mideo et al., 2008), seems necessary to  
296 study co-infection by different species.

297 In the present model, we assumed no direct link between immunosuppression and virulence. How-  
298 ever, immune evasion strategies of bacteria and viruses have been empirically linked to a range of  
299 pathological effects (Casadevall and Pirofski, 2003, Monack et al., 2004, Stanford et al., 2007). On  
300 the other hand, immunosuppression may decrease immunopathology which can therefore reduce host  
301 mortality, as shown experimentally using rodent malaria infections (Long et al., 2008, Long and Gra-  
302 ham, 2011). In fact, helminth therapy, which involves deliberate ingestion of parasitic worms, takes  
303 advantage of the parasite's ability to mediate host immunity and has been successful in countering  
304 inflammations caused by immune-mediated diseases (Day et al., 2007, Elliott and Weinstock, 2009,



305 Summers et al., 2003).

306 The only cost of immunosuppression we assumed is indirect (co-infection facilitation), however  
307 the production of immunosuppressive compounds could impose a direct fitness cost to individual  
308 pathogens. At the within-host level, immunosuppression would therefore be seen as a public good  
309 since parasites that do not invest in it can still reap the benefits (Diard et al., 2013, Rundell et al., 2016).  
310 In fact, our model predicts that invasive repellors are common for immunosuppression (Fig. 3a)  
311 while coexistence of two strains with extreme immunosuppression strategies (i.e., zero and maximum  
312 immunosuppression) is always possible regardless of trade-off concavity (figure not shown). These  
313 findings suggest that it may be common for some strains to specialise in immunosuppressing and  
314 others in exploiting these immunosuppressed hosts.

315 Understanding how host immunity and the corresponding parasite immune evasion strategies af-  
316 fect virulence evolution is a key challenge for contemporary evolutionary epidemiology (Frank and  
317 Schmid-Hempel, 2008). Our results demonstrate that immune evasion mechanisms are among the  
318 major forces shaping virulence evolution at the between-host level. Future theoretical studies may  
319 focus on multi-species epidemiological dynamics, direct trade-offs between immunosuppression and  
320 virulence and life-history perspectives.

## 321 **Acknowledgements**

322 We thank Sébastien Lion, Stéphane Cornet, Philip Agnew, Matthew Hartfield, Yannis Michalakis and  
323 Mircea Sofonea for comments and discussions and Céline Devaux and Katie O'Dwyer for comments  
324 on an earlier draft.

## 325 **References**

- 326 Alizon, S., 2008a. Decreased overall virulence in coinfecting hosts leads to the persistence of virulent  
327 parasites. *American Naturalist* 172:E67–E79.
- 328 ———, 2008b. Transmission-recovery trade-offs to study parasite evolution. *American Naturalist*  
329 172:E113–E121.
- 330 ———, 2013. Parasite co-transmission and the evolutionary epidemiology of virulence: co-  
331 transmission and virulence evolution. *Evolution* 67:921–933.
- 332 Alizon, S., A. Hurford, N. Mideo, and M. Van Baalen, 2009. Virulence evolution and the trade-  
333 off hypothesis: history, current state of affairs and the future. *Journal of Evolutionary Biology*  
334 22:245–259.
- 335 Alizon, S. and Y. Michalakis, 2015. Adaptive virulence evolution: the good old fitness-based ap-  
336 proach. *Trends in Ecology & Evolution* 30:248–254.
- 337 Alizon, S., J. C. de Roode, and Y. Michalakis, 2013. Multiple infections and the evolution of viru-  
338 lence. *Ecology Letters* 16:556–567.
- 339 Anderson, R. and R. May, 1982. Coevolution of hosts and parasites. *Parasitology* 85:411–426.
- 340 van Baalen, M. and M. W. Sabelis, 1995. The dynamics of multiple infection and the evolution of  
341 virulence. *American Naturalist* Pp. 881–910.
- 342 Balmer, O. and M. Tanner, 2011. Prevalence and implications of multiple-strain infections. *Lancet*  
343 *Infectious Diseases* 11:868–878.
- 344 Bell, A. S., J. C. De Roode, D. Sim, and A. F. Read, 2006. Within-host competition in genetically  
345 diverse malaria infections: parasite virulence and competitive success. *Evolution* 60:1358–1371.

- 346 Ben-Ami, F., L. Mouton, and D. Ebert, 2008. The effects of multiple infections on the expression and  
347 evolution of virulence in a *Daphnia*-endoparasite system. *Evolution* 62:1700–1711.
- 348 Biron, D., P. Agnew, L. Marche, L. Renault, C. Sidobre, and Y. Michalakis, 2005. Proteome of *Aedes*  
349 *aegypti* larvae in response to infection by the intracellular parasite *Vavraia culicis*. *International*  
350 *Journal for Parasitology* 35:1385–1397.
- 351 Bowers, R. G., A. Hoyle, A. White, and M. Boots, 2005. The geometric theory of adaptive evolution:  
352 trade-off and invasion plots. *Journal of Theoretical Biology* 233:363–377.
- 353 Casadevall, A. and L.-a. Pirofski, 2003. The damage-response framework of microbial pathogenesis.  
354 *Nature Reviews Microbiology* 1:17–24.
- 355 Choisy, M. and J. C. de Roode, 2010. Mixed infections and the evolution of virulence: effects  
356 of resource competition, parasite plasticity, and impaired host immunity. *American Naturalist*  
357 175:E105–E118.
- 358 Cornet, S. and G. Sorci, 2010. Parasite virulence when the infection reduces the host immune re-  
359 sponse. *Proceedings of the Royal Society B: Biological Sciences* 277:1929–1935.
- 360 Cox, F., 2001. Concomitant infections, parasites and immune responses. *Parasitology* 122:S23–S38.
- 361 Cressler, C. E., D. V. Mcleod, C. Rozins, J. Van Den Hoogen, and T. Day, 2016. The adaptive evolu-  
362 tion of virulence: a review of theoretical predictions and empirical tests. *Parasitology* 143:915–930.
- 363 Day, T., A. L. Graham, and A. F. Read, 2007. Evolution of parasite virulence when host responses  
364 cause disease. *Proceedings of the Royal Society of London B: Biological Sciences* 274:2685–2692.
- 365 Day, T. and S. R. Proulx, 2004. A general theory for the evolutionary dynamics of virulence. *Ameri-  
366 can Naturalist* 163:E40–E63.

- 367 Diard, M., V. Garcia, L. Maier, M. N. Remus-Emsermann, R. R. Regoes, M. Ackermann, and W.-D.  
368 Hardt, 2013. Stabilization of cooperative virulence by the expression of an avirulent phenotype.  
369 Nature 494:353–356.
- 370 Dieckmann, U., J. A. Metz, and M. W. Sabelis, 2002. Adaptive dynamics of infectious diseases: in  
371 pursuit of virulence management, vol. 2. Cambridge University Press.
- 372 Doorbar, J., W. Quint, L. Banks, I. G. Bravo, M. Stoler, T. R. Broker, and M. A. Stanley, 2012. The  
373 biology and life-cycle of human papillomaviruses. Vaccine 30:F55–F70.
- 374 Ebert, D., 2005. Introduction to the ecology, epidemiology, and evolution of parasitism in *Daphnia* .
- 375 Ebert, D. and K. L. Mangin, 1997. The influence of host demography on the evolution of virulence  
376 of a microsporidian gut parasite. Evolution Pp. 1828–1837.
- 377 Elliott, D. E. and J. V. Weinstock, 2009. Helminthic therapy: using worms to treat immune-mediated  
378 disease. Pp. 157–166, in Pathogen-Derived Immunomodulatory Molecules. Springer.
- 379 Eshel, I., 1983. Evolutionary and continuous stability. Journal of Theoretical Biology 103:99–111.
- 380 Ewald, P., 1994. Evolution of Infectious Disease. Oxford University Press.
- 381 Ewald, P. W., 1983. Host-parasite relations, vectors, and the evolution of disease severity. Annual  
382 Review of Ecology and Systematics Pp. 465–485.
- 383 Frank, S. and P. Schmid-Hempel, 2008. Mechanisms of pathogenesis and the evolution of parasite  
384 virulence. Journal of Evolutionary Biology 21:396–404.
- 385 Gandon, S., V. A. Jansen, and M. Van Baalen, 2001. Host life history and the evolution of parasite  
386 virulence. Evolution 55:1056–1062.
- 387 Geritz, S. A., G. Mesze, J. Metz, et al., 1998. Evolutionarily singular strategies and the adaptive  
388 growth and branching of the evolutionary tree. Evolutionary Ecology 12:35–57.

- 389 Graham, A. L., 2008. Ecological rules governing helminth–microparasite coinfection. *Proceedings*  
390 *of the National Academy of Sciences* 105:566–570.
- 391 Graham, A. L., T. J. Lamb, A. F. Read, and J. E. Allen, 2005. Malaria-filaria coinfection in mice  
392 makes malarial disease more severe unless filarial infection achieves patency. *Journal of Infectious*  
393 *Diseases* 191:410–421.
- 394 Hoverman, J. T., B. J. Hoyer, and P. T. Johnson, 2013. Does timing matter? how priority effects  
395 influence the outcome of parasite interactions within hosts. *Oecologia* 173:1471–1480.
- 396 Hurford, A. and T. Day, 2013. Immune evasion and the evolution of molecular mimicry in parasites.  
397 *Evolution* 67:2889–2904.
- 398 Juliano, J. J., K. Porter, V. Mwapasa, R. Sem, W. O. Rogers, F. Ariey, C. Wongsrichanalai, A. Read,  
399 and S. R. Meshnick, 2010. Exposing malaria in-host diversity and estimating population diver-  
400 sity by capture-recapture using massively parallel pyrosequencing. *Proceedings of the National*  
401 *Academy of Sciences* 107:20138–20143.
- 402 Kisdi, É., 2006. Trade-off geometries and the adaptive dynamics of two co-evolving species. *Evolu-*  
403 *tionary Ecology Research* 8:959–973.
- 404 Levy, J., 1998. *HIV and the pathogenesis of AIDS*. ASM Press.
- 405 Lipsitch, M., C. Colijn, T. Cohen, W. P. Hanage, and C. Fraser, 2009. No coexistence for free: neutral  
406 null models for multistrain pathogens. *Epidemics* 1:2–13.
- 407 Long, G. H., B. H. Chan, J. E. Allen, A. F. Read, and A. L. Graham, 2008. Experimental manipulation  
408 of immune-mediated disease and its fitness costs for rodent malaria parasites. *BMC Evolutionary*  
409 *Biology* 8:128.

- 410 Long, G. H. and A. L. Graham, 2011. Consequences of immunopathology for pathogen virulence  
411 evolution and public health: malaria as a case study. *Evolutionary Applications* 4:278–291.
- 412 Maynard Smith, J., 1982. *Evolution and the Theory of Games*. Cambridge University Press.
- 413 Méthot, P.-O., 2012. Why do parasites harm their host? on the origin and legacy of theobald smith's"  
414 law of declining virulence"—1900-1980. *History and Philosophy of the Life Sciences* Pp. 561–601.
- 415 Mideo, N., 2009. Parasite adaptations to within-host competition. *Trends in Parasitology* 25:261–268.
- 416 Mideo, N., S. Alizon, and T. Day, 2008. Linking within-and between-host dynamics in the evolution-  
417 ary epidemiology of infectious diseases. *Trends in Ecology & Evolution* 23:511–517.
- 418 Monack, D. M., A. Mueller, and S. Falkow, 2004. Persistent bacterial infections: the interface of the  
419 pathogen and the host immune system. *Nature Reviews Microbiology* 2:747–765.
- 420 Otto, S. P. and T. Day, 2007. *A biologist's guide to mathematical modeling in ecology and evolution*,  
421 vol. 13. Princeton University Press.
- 422 Palefsky, J. M. and E. A. Holly, 2003. Immunosuppression and co-infection with HIV. *JNCI Mono-*  
423 *graphs* 2003:41–46.
- 424 Petney, T. N. and R. H. Andrews, 1998. Multiparasite communities in animals and humans: frequency,  
425 structure and pathogenic significance. *International Journal for Parasitology* 28:377–393.
- 426 Read, A. F., 1994. The evolution of virulence. *Trends in Microbiology* 2:73–76.
- 427 Read, A. F. and L. H. Taylor, 2001. The ecology of genetically diverse infections. *Science* 292:1099–  
428 1102.
- 429 Rivero, A., 2006. Nitric oxide: an antiparasitic molecule of invertebrates. *Trends in Parasitology*  
430 22:219–225.

- 431 Rockstroh, J. K. and U. Spengler, 2004. HIV and hepatitis C virus co-infection. *Lancet Infectious*  
432 *Diseases* 4:437–444.
- 433 de Roode, J. C., R. Pansini, S. J. Cheesman, M. E. Helinski, S. Huijben, A. R. Wargo, A. S. Bell,  
434 B. H. Chan, D. Walliker, and A. F. Read, 2005. Virulence and competitive ability in genetically  
435 diverse malaria infections. *Proceedings of the National Academy of Sciences of the United States*  
436 *of America* 102:7624–7628.
- 437 Rundell, E. A., S. A. McKeithen-Mead, and B. I. Kazmierczak, 2016. Rampant cheating by  
438 pathogens? *PLoS Pathogens* 12:e1005792.
- 439 Sasaki, A. and Y. Iwasa, 1991. Optimal growth schedule of pathogens within a host: switching  
440 between lytic and latent cycles. *Theoretical Population Biology* 39:201–239.
- 441 Schmid-Hempel, P., 2008. Parasite immune evasion: a momentous molecular war. *Trends in Ecology*  
442 *& Evolution* 23:318–326.
- 443 ———, 2009. Immune defence, parasite evasion strategies and their relevance for 'macroscopic  
444 phenomena' such as virulence. *Philosophical Transactions of the Royal Society B: Biological*  
445 *Sciences* 364:85–98.
- 446 ———, 2011. *Evolutionary parasitology: the integrated study of infections, immunology, ecology,*  
447 *and genetics.* Oxford University Press New York.
- 448 Schmid-Hempel, P. and S. A. Frank, 2007. Pathogenesis, virulence, and infective dose. *PLoS*  
449 *Pathogens* 3:e147.
- 450 Stanford, M. M., G. McFadden, G. Karupiah, and G. Chaudhri, 2007. Immunopathogenesis of  
451 poxvirus infections: forecasting the impending storm. *Immunology and Cell Biology* 85:93–102.

- 452 Summers, R. W., D. E. Elliott, K. Qadir, J. F. Urban, R. Thompson, and J. V. Weinstock, 2003.  
453 *Trichuris suis* seems to be safe and possibly effective in the treatment of inflammatory bowel dis-  
454 ease. *American Journal of Gastroenterology* 98:2034–2041.
- 455 Virgin, H. W., E. J. Wherry, and R. Ahmed, 2009. Redefining chronic viral infection. *Cell* 138:30–50.
- 456 Zwart, M. P., W. Van Der Werf, M. M. Van Oers, L. Hemerik, J. Van Lent, J. De Visser, J. M. Vlak,  
457 and J. S. Cory, 2009. Mixed infections and the competitive fitness of faster-acting genetically  
458 modified viruses. *Evolutionary Applications* 2:209–221.



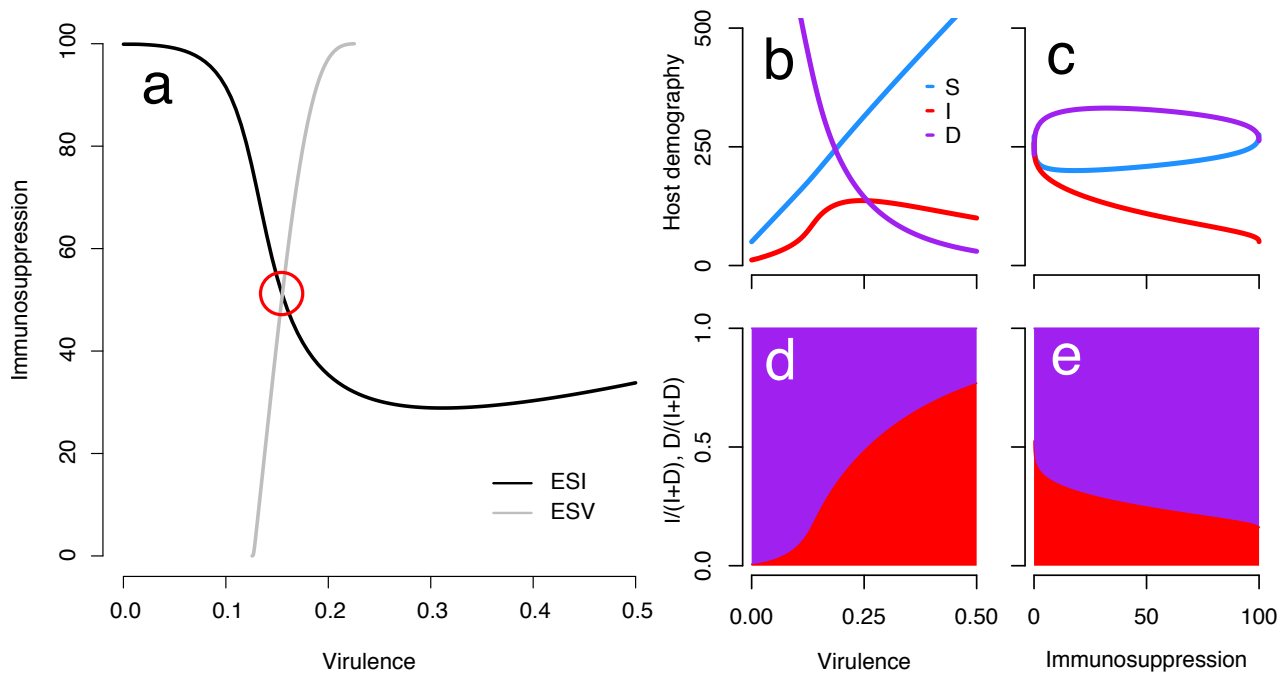

Fig. 1: (a) Evolutionarily stable immunosuppression (ESI; black) and virulence (ESV; grey) against fixed values of the other trait. The co-evolutionarily stable strategy (co-ESS) of the two traits occurs at the intersection of the two lines, indicated by the red circle. The immunosuppression trade-offs for the recovery rate and additional susceptibility were decelerating and accelerating, respectively with shape parameters  $\delta_\gamma = 0.05$  and  $\delta_\sigma = 0.25$ . The population size of the three host classes — susceptible ( $S$ ; blue), singly infected ( $I$ ; red) and doubly infected ( $D$ ; purple) — underlying the ESI for a given level of virulence and the ESV for a given level of immunosuppression is presented in (b) and (c). The relative abundances of singly (red) and doubly (purple) infected host are plotted in (d) and (e).

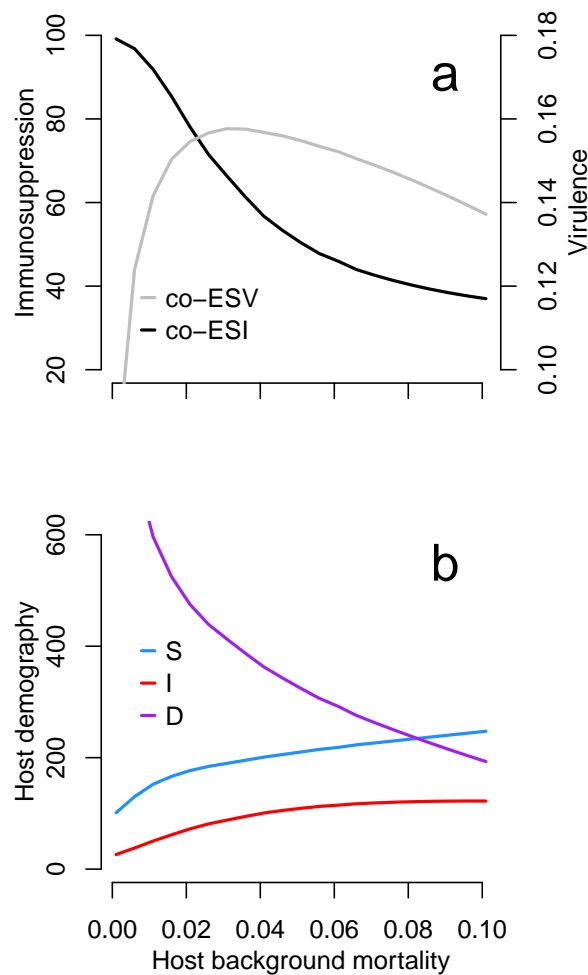

Fig. 2: Co-evolutionarily stable immunosuppression (co-ESI; black) and virulence (co-ESV; grey) strategies against host background mortality (a) and the equilibrium population size of the three host classes — susceptible ( $S$ ; blue), singly infected ( $I$ ; red) and doubly infected ( $D$ ; purple) that result from the co-ES trait combination.

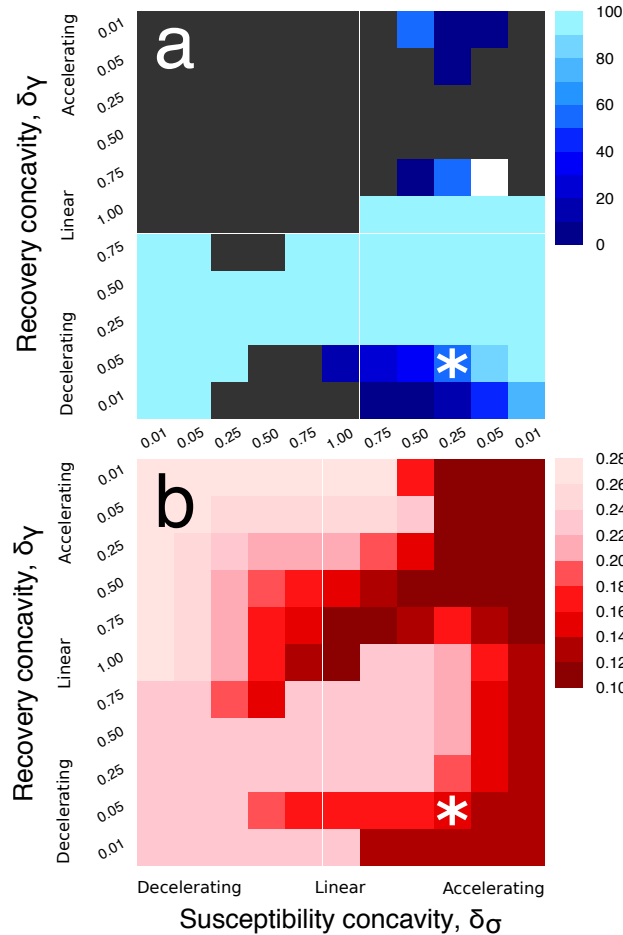

Fig. 3: The trade-off concavity affects the evolutionarily outcome of (a) immunosuppression and (b) virulence at the co-evolutionarily singular strategies. The asterisk (\*) indicates the default set of trade-off parameters explored in Figure 1 and 2. The dark grey squares in (a) indicate that the immunosuppression strategy is evolutionarily and convergent unstable at the co-evolutionarily singular strategy, i.e. invasive repeller. The white square in (a) indicates that the immunosuppression strategy is convergence stable, but evolutionarily unstable, i.e., an evolutionary branching point.
